# Supplementary material for: In situ investigation of the mechanochemically promoted Pd–Ce interaction under stoichiometric methane oxidation conditions
Source: Royal Society of Chemistry journal article supplement (doi:10.1039/d2ey00067a), 2022-12-08
Supplement: d2ey00067a1.pdf [file d2ey00067a1.pdf]

## Electronic Supplementary Information

### **In-situ investigation of the mechanochemically promoted Pd-Ce interaction under stoichiometric methane oxidation conditions**

Maila Danielis,<sup>a</sup> Núria J. Divins,<sup>b,c</sup> Jordi Llorca,<sup>b,c</sup> Lluís Soler,<sup>b,c</sup> Xènia Garcia,<sup>b,c</sup> Isabel Serrano,<sup>b</sup> Luis E. Betancourt,<sup>d</sup> Wenqian Xu,<sup>e</sup> José A. Rodríguez,<sup>d</sup> Sanjaya D. Senanayake,<sup>d</sup> Sara Colussi,<sup>a</sup> and Alessandro Trovarelli<sup>a</sup>

<sup>a</sup> *Dipartimento Politecnico, Università di Udine, and INSTM, via del Cotonificio 108, 33100 Udine, Italy*

<sup>b</sup> *Institute of Energy Technologies and Department of Chemical Engineering, Universitat Politècnica de Catalunya, EEBE, Eduard Maristany 10-14, 08019 Barcelona, Spain*

<sup>c</sup> *Barcelona Research Center in Multiscale Science and Engineering, Universitat Politècnica de Catalunya, EEBE, Eduard Maristany 10-14, 08019 Barcelona, Spain*

<sup>d</sup> *Chemistry Division, Brookhaven National Laboratory, Upton, NY 11973, USA*

<sup>e</sup> *X-ray Science Division, Advanced Photon Source, Argonne National Laboratory, Lemont, IL, 60439 USA*

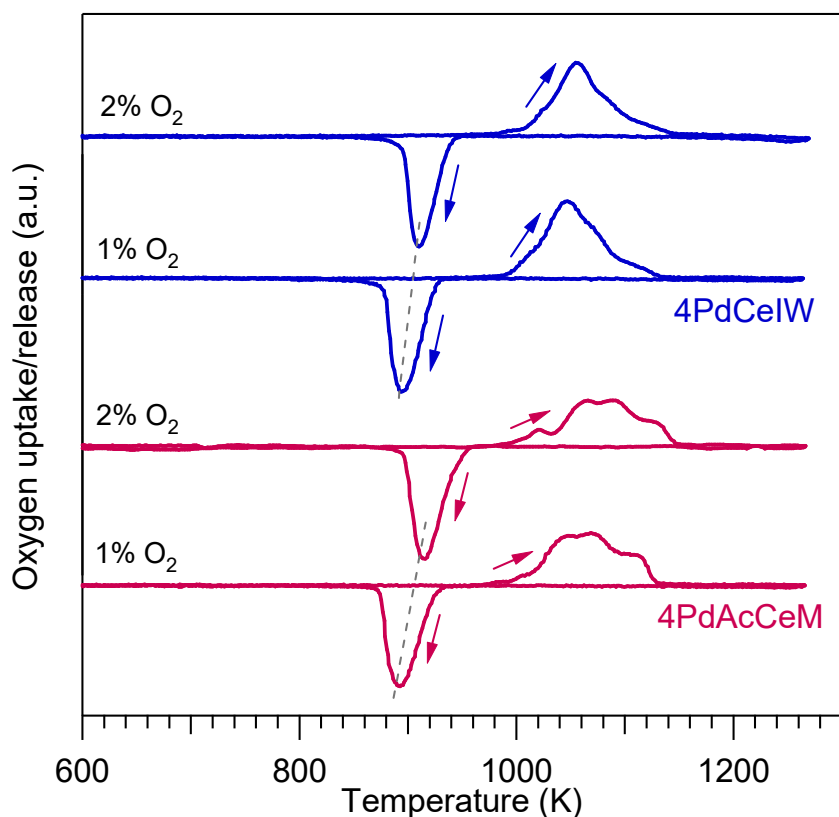

**Fig. S1.** Oxygen uptake profiles recorded on 4PdAcCeM and 4PdCeIW during Temperature Programmed Oxidation (TPO) tests carried out under different O<sub>2</sub> concentration; third heating/cooling TPO cycle.

**Table S1.** Quantitative analysis of the O<sub>2</sub> exchanged in the 3<sup>rd</sup> heating/cooling TPO cycle on M and IW catalysts (Figure S1). In parentheses the corresponding amount of reacting Pd (%)<sup>\*</sup> is reported.

| Sample   | O <sub>2</sub> content (vol%) | Heating: O <sub>2</sub> release<br>(μmoles O <sub>2</sub> /g) | Cooling: O <sub>2</sub> uptake<br>(μmoles O <sub>2</sub> /g) |
|----------|-------------------------------|---------------------------------------------------------------|--------------------------------------------------------------|
| 4PdCeIW  | 2%                            | 147.6 (80)                                                    | 123.2 (67)                                                   |
|          | 1%                            | 163.2 (89)                                                    | 148.8 (81)                                                   |
| 4PdAcCeM | 2%                            | 140.3 (76)                                                    | 133.9 (73)                                                   |
|          | 1%                            | 145.9 (79)                                                    | 144.0 (78)                                                   |

\*Ratio between the moles of Pd atoms reacting with the calculated amount of O<sub>2</sub> consumed/released, following the stoichiometry Pd+1/2O<sub>2</sub> → PdO, and the amount of Pd loaded on the catalyst as measured by ICP analysis:

$$\begin{aligned}
 \text{reacting Pd (\%)} &= \frac{2 [\text{moles of O}_2 \text{ consumed/released}]}{\text{amount of Pd (moles)}} \cdot 100 \\
 &= \frac{2 [\text{moles of O}_2 \text{ consumed/released}]}{\frac{\text{cat. wt (g)} \cdot \text{Pd loading}}{MW_{Pd}(\frac{\text{g}}{\text{mol}})}} \cdot 100
 \end{aligned}$$

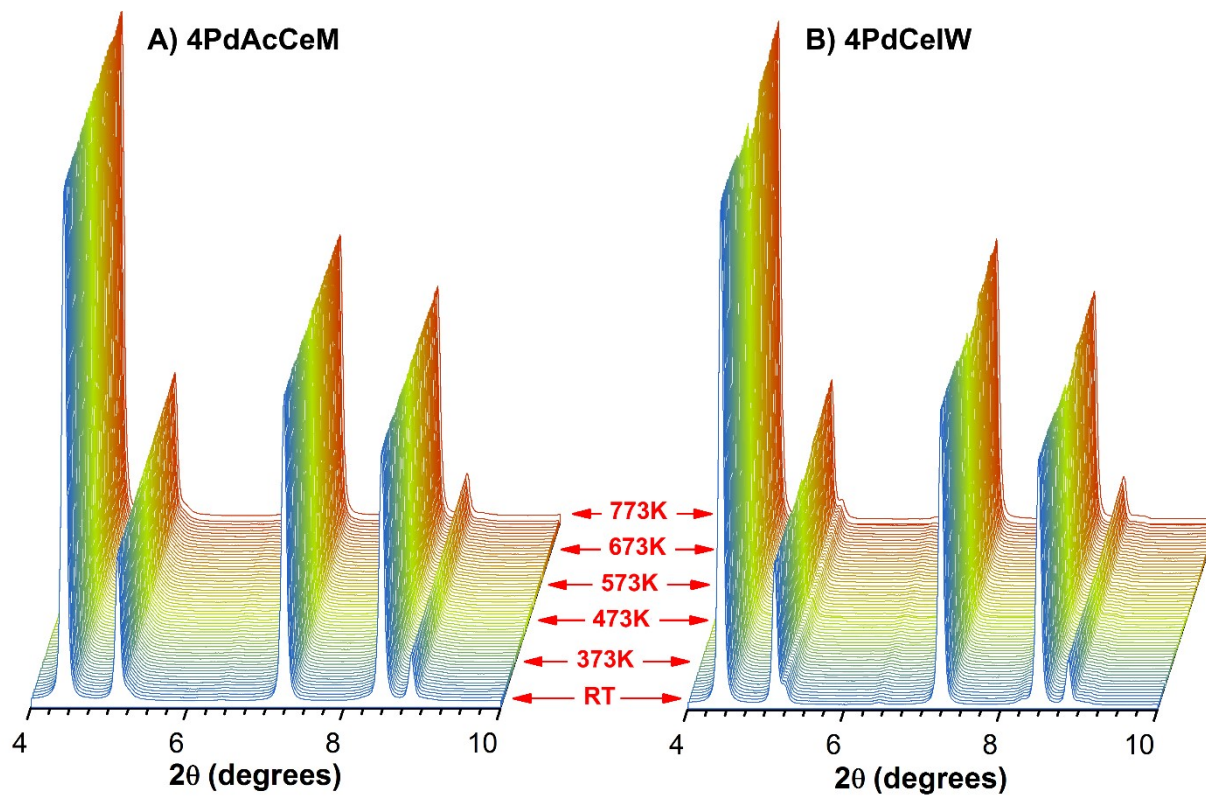

**Fig. S2.** In-situ XRD diffraction patterns collected under stoichiometric methane oxidation conditions (0.3%CH<sub>4</sub>, 0.6%O<sub>2</sub> in He) on (A) 4PdAcCeM and (B) 4PdCeIW; samples were heated from RT to 773K at a 10°C/min heating rate, scans were collected every 60s.

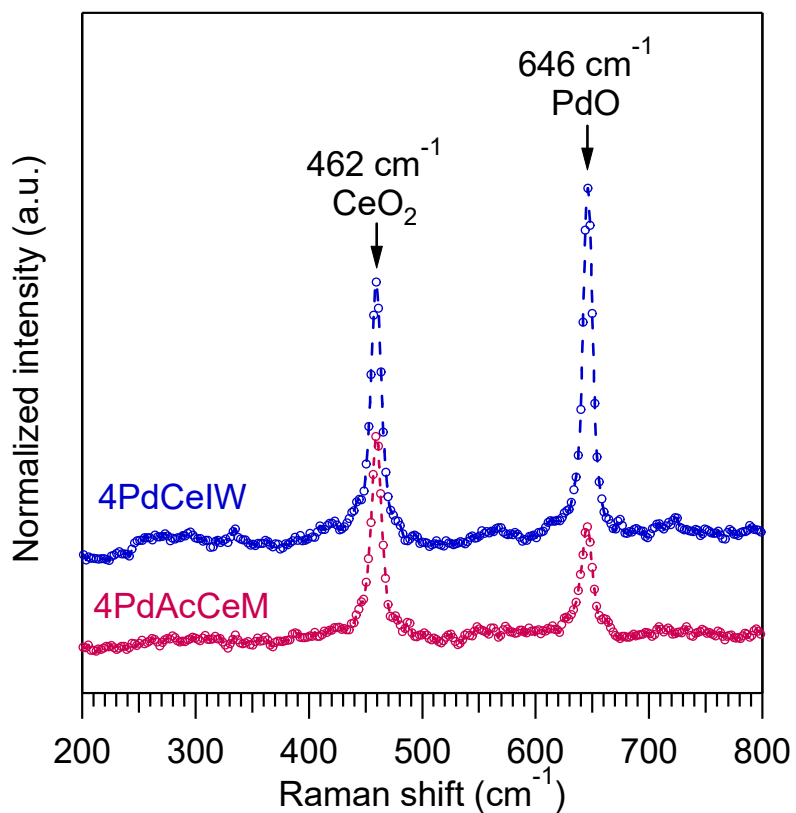

**Fig. S3.** Ex-situ Raman characterization of 4PdAcCeM and 4PdCeIW samples after reaction at 1173K. Collected spectra were normalized using the intensity of the CeO<sub>2</sub> F<sub>2g</sub> peak (at 462 cm<sup>-1</sup>); the low Signal-to-Noise Ratio (SNR) is due to the dark color of the 4wt%Pd loaded samples.

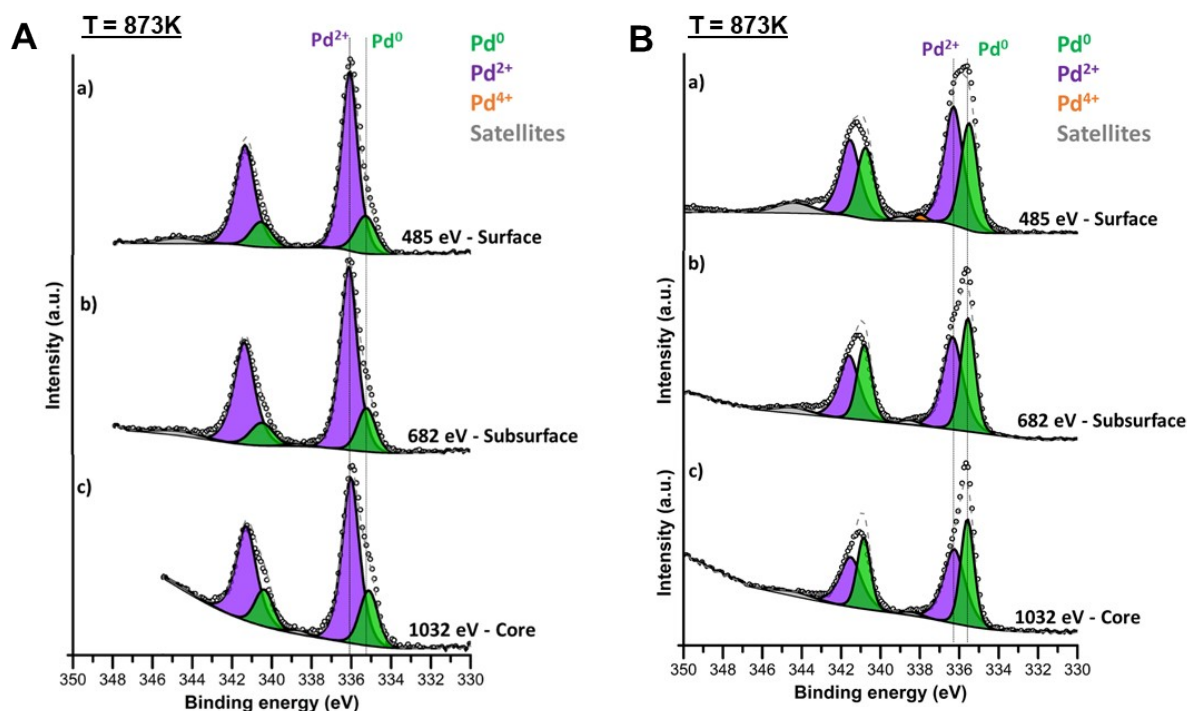

**Fig. S4.** Comparison of the NAP-XPS spectra collected in the Pd 3d region at different penetration depths on (A) 4PdCeIW and (B) 4PdAcCeM under 0.6 mbar CH<sub>4</sub>, 1.4 mbar O<sub>2</sub> at 873K.

**Table S2.** Quantification of AP-XPS spectra for samples 4PdCeIW and 4PdAcCeM.

| 4PdCeIW                    | at.%Pd | Ce <sup>4+</sup> /Ce | Pd <sup>0</sup> /Pd | $\Delta$ EB (Pd <sup>2+</sup> -Pd <sup>0</sup> )* | O-Ce/O | O-H <sub>2</sub> O gas/O lattice |
|----------------------------|--------|----------------------|---------------------|---------------------------------------------------|--------|----------------------------------|
| 673K                       | 10.2   | 95.8                 | 14.5                | 0.69                                              | 33.7   | 2.9                              |
| 773K                       | 19.4   | 93.9                 | 18.0                | 0.81                                              | 31.5   | 3.6                              |
| 873K - 485 eV              | 19.6   | 93.7                 | 19.5                | 0.81                                              | 32.4   | 3.1                              |
| 873K - 682 eV (Subsurface) |        |                      | 18.6                |                                                   |        |                                  |
| 873K - 1032 eV (Core)      |        |                      | 24.4                |                                                   |        |                                  |

  

| 4PdAcCeM                   | at.%Pd | Ce <sup>4+</sup> /Ce | Pd <sup>0</sup> /Pd | $\Delta$ EB (Pd <sup>2+</sup> -Pd <sup>0</sup> )* | O-Ce/O | O-H <sub>2</sub> O gas/O lattice |
|----------------------------|--------|----------------------|---------------------|---------------------------------------------------|--------|----------------------------------|
| 673K                       | 24.3   | 96.8                 | 22.3                | 0.89                                              | 87.0   | 1.6                              |
| 773K                       | 21.7   | 95.4                 | 39.4                | 0.83                                              | 77.4   | 2.7                              |
| 873K - 485 eV              | 21.9   | 93.3                 | 40.0                | 0.79                                              | 90.0   | 1.1                              |
| 873K - 682 eV (Subsurface) |        |                      | 43.3                |                                                   |        |                                  |
| 873K - 1032 eV (Core)      |        |                      | 43.6                |                                                   |        |                                  |

\* $\Delta$ EB: binding energy difference.

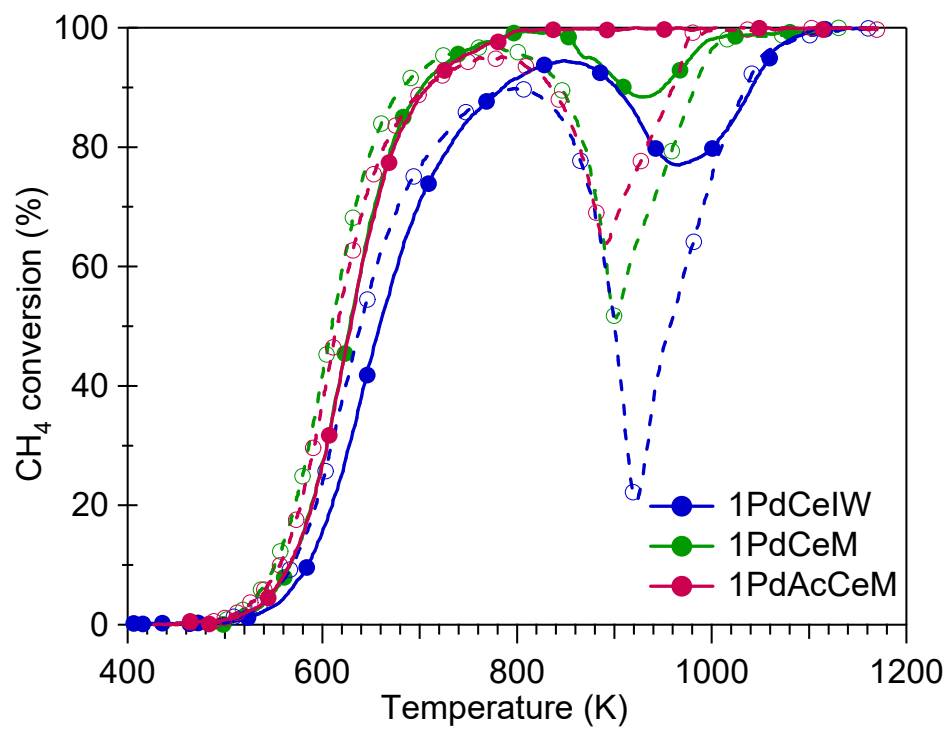

**Fig. S5.** Methane oxidation activity of 1wt%Pd/CeO<sub>2</sub> samples under stoichiometric methane oxidation conditions (0.5% CH<sub>4</sub>, 1% O<sub>2</sub>, He to balance); GHSV = 180,000 h<sup>-1</sup>.
